# Supplementary material for: Molecular dissection of multiphase inactivation of the bacterial sodium channel NaVAb
Source: PubMed Central journal article supplement — J Gen Physiol. 2019 Feb 4;151(2):174–85. doi: 10.1085/jgp.201711884 (PMC6363407; doi:10.1085/jgp.201711884), 2019-02-04
Supplement: JGP_201711884_sm.pdf [file JGP_201711884_sm.pdf]

## Supplemental material

Gamal El-Din et al., <https://doi.org/10.1085/jgp.201711884>

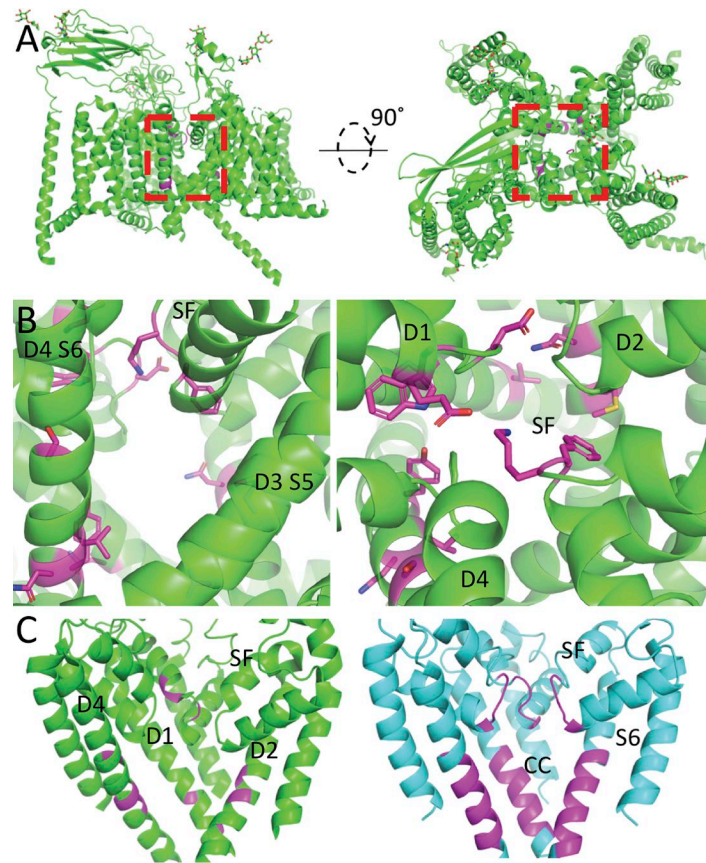

Figure S1. **Residues involved in slow inactivation of mammalian Na<sub>v</sub> channels compared with Na<sub>v</sub>Ab regions that change conformation during adoption of its putative slow inactivated state.** (A) Orthogonal views of the overall fold of Na<sub>v</sub>1.4 from electric eel, as determined by cryo-EM (PDB accession no. 5XSY). Residues shown to affect mammalian slow inactivation have been highlighted in magenta (see also Table S1). (B) Close-up view of the red boxes shown in A, with residues from Table S1 shown in stick format. Left: View of the central cavity as if the viewer is standing in the fenestration between domain 3 (D3) and domain 4 (D4) of Na<sub>v</sub>1.4. Right: View of the protein as if the viewer is standing above the channel and looking downward through the selectivity filter (SF) and permeation pathway. D, domain. (C) A view of Na<sub>v</sub>1.4 (left, green) and Na<sub>v</sub>Ab (right, cyan) with one of four monomers and voltage sensors removed in order to highlight residues involved in slow inactivation of eukaryotic (left, magenta) and prokaryotic channels (right, magenta). We have used homology to map involved residues (highlighted in magenta, listed in Table S1) onto Na<sub>v</sub>1.4.

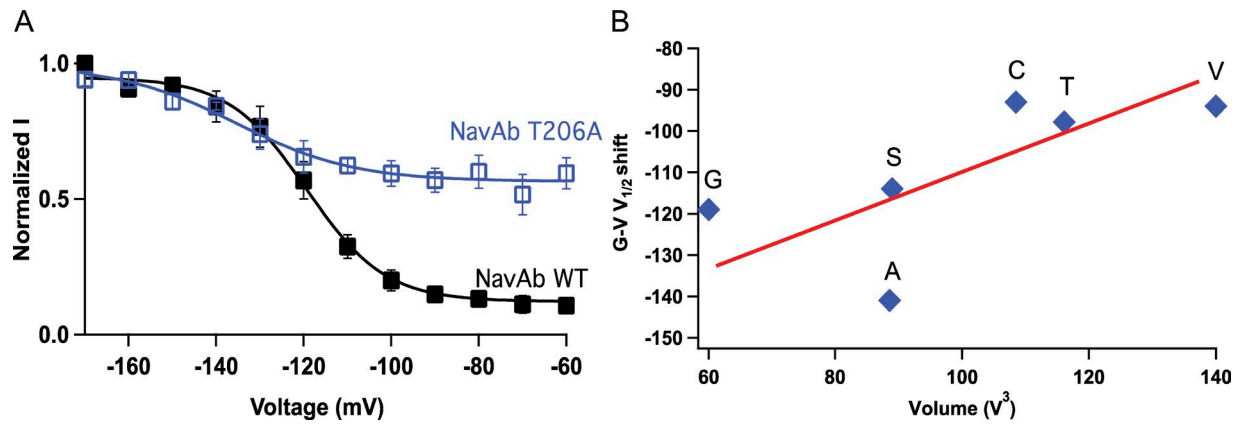

Figure S2. **Effects of Thr206 mutations on voltage dependence of steady-state early inactivation and voltage dependence of activation. (A)** Steady-state inactivation curves for T206A and NavAb/WT. **(B)** Midpoints ( $V_{1/2}$ ) of G-V curves for constructs with the indicated amino acid residues at position 206 plotted as a function of side-chain volume. Error bars represent SEM.

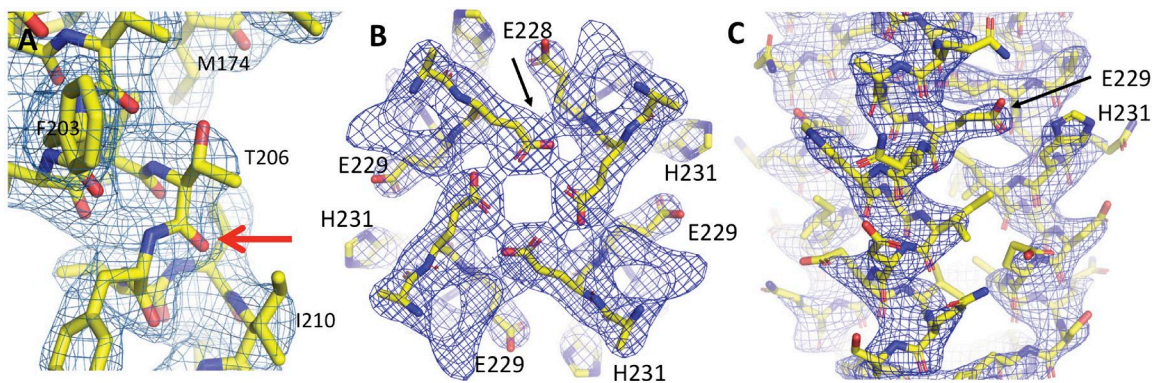

Figure S3. **Electron density maps of the S6 helix at Thr206 and the C-terminal coiled-coil motif. (A)** A simulated annealing omit map is shown for NavAb $\Delta$ 28. The map was calculated with omission of residues Ile202 through Leu212 and is contoured at 1.0 sigma in stick format. Arrow highlights the main chain carbonyl at Thr206 to show the high quality of our electron density measurements at this resolution. **(B and C)** Exemplar electron density is shown for NavAb $\Delta$ 28 in orthogonal views. Left: Four-helix bundle and key intersubunit hydrogen bonds at the level of Glu228, Glu229, and His231. A 2fo-fc electron density map shown at 1.0 sigma as blue mesh, and selected side chains are shown in stick format. Right: Four-helix bundle of the C-terminal domain with maps and protein model as in the left panel.

Table S1. **Structural comparison of early voltage-dependent inactivation of bacterial Na<sub>v</sub> channels to slow inactivation in mammalian Na<sub>v</sub> channels**

| Residue (Na <sub>v</sub> Ab) | Location           | Homolog (eukaryotic Na <sub>v</sub> )                                    | References                                                                   |
|------------------------------|--------------------|--------------------------------------------------------------------------|------------------------------------------------------------------------------|
| L176                         | Selectivity filter | F1236 (rat Na <sub>v</sub> 1.4 D4)                                       | <a href="#">Ong et al., 2000</a>                                             |
| E177                         | Selectivity filter | D400, K1237 (rat Na <sub>v</sub> 1.4, D1 and D4)                         | <a href="#">Todt et al., 1999</a> ; <a href="#">Hilber et al., 2005</a>      |
| W179                         | Selectivity filter | W402 (rat Na <sub>v</sub> 1.4, D1)                                       | <a href="#">Balsler et al., 1996</a>                                         |
| S180                         | Selectivity filter | E403 (rat Na <sub>v</sub> 1.4, D1)                                       | <a href="#">Xiong et al., 2006</a>                                           |
| V205                         | S6 helix           | S1579 (human Na <sub>v</sub> 1.5, D4)                                    | <a href="#">Wang et al., 2005</a>                                            |
| T206                         | S6 helix           | N927 (human Na <sub>v</sub> 1.5, D2)                                     | <a href="#">Chancey et al., 2007</a>                                         |
| M209                         | S6 helix           | V787 (rat Na <sub>v</sub> 1.4, D2), V930 (human Na <sub>v</sub> 1.5, D2) | <a href="#">O'Reilly et al., 2001</a> ; <a href="#">Chancey et al., 2007</a> |
| I210                         | S6 helix           | V1583 (rat Na <sub>v</sub> 1.4, D4)                                      | <a href="#">Vedantham and Cannon, 2000</a>                                   |
| N211                         | S6 helix           | N434A, N1466 (rat Na <sub>v</sub> 1.4, D1 and D4)                        | <a href="#">Wang and Wang, 1997</a> ; <a href="#">Chen et al., 2006</a>      |
| V213                         | S6 helix           | Y1586 (rat Na <sub>v</sub> 1.4, D4)                                      | <a href="#">O'Reilly et al., 2000</a>                                        |
| I216                         | S6 helix           | V445 (human Na <sub>v</sub> 1.4, D1)                                     | <a href="#">Takahashi and Cannon, 1999</a>                                   |

The indicated amino acid residues in Na<sub>v</sub>Ab are listed in the first column, and their locations in the structure are listed in the second column. The analogous amino acid residue in a mammalian Na<sub>v</sub> channel is listed in the third column, and references showing the effects of mutation of this amino acid residue on slow inactivation are given in the fourth column. D, domain.

Table S2. X-ray data collection and refinement statistics

|                                                | NavAbΔ28                      | NavAb28/T206A                 | NavAbΔ28/T206S                | NavAbΔ28/T206V                |
|------------------------------------------------|-------------------------------|-------------------------------|-------------------------------|-------------------------------|
| <b>Data collection</b>                         |                               |                               |                               |                               |
| Space group                                    | I422                          | I422                          | I422                          | I422                          |
| Unit cell (a, b, c, α = β = γ)                 | 124.772 124.772<br>189.797 90 | 123.849 123.849<br>190.006 90 | 124.495 124.495<br>189.669 90 | 124.175 124.175<br>189.868 90 |
| R <sub>meas</sub> <sup>a</sup>                 | 0.105 (>1)                    | 0.123 (>1)                    | 0.097 (>1)                    | 0.101 (>1)                    |
| R <sub>merge</sub>                             | 0.103 (>1)                    | 0.120 (>1)                    | 0.09 (>1)                     | 0.099 (>1)                    |
| R <sub>pim</sub> <sup>b</sup>                  | 0.030 (0.480)                 | 0.044 (0.383)                 | 0.037 (0.667)                 | 0.033 (0.480)                 |
| I/σ I                                          | 22.6 (0.5)                    | 22 (1.0)                      | 18.3 (0.5)                    | 24.6 (1.0)                    |
| Resolution average I/σ I = 2                   | 2.64                          | 2.74                          | 2.59                          | 2.59                          |
| Completeness (%)                               | 97.4 (79.0)                   | 99.1 (88.7)                   | 97.3 (84.9)                   | 99.8 (98.6)                   |
| Redundancy                                     | 12.7 (5.3)                    | 9.4 (5.6)                     | 7 (6.0)                       | 11.1 (7.7)                    |
| CC <sub>1/2</sub> (highest shell) <sup>c</sup> | 0.581                         | 0.790                         | 0.506                         | 0.862                         |
| <b>Refinement</b>                              |                               |                               |                               |                               |
| Resolution (Å)                                 | 29.78–2.40 (2.49–2.40)        | 29.67–2.60<br>(2.693–2.60)    | 29.57–2.327<br>(2.411–2.327)  | 29.74–2.50 (2.59–2.50)        |
| Reflections                                    | 28,621 (2,189)                | 22,844 (2,075)                | 30,943 (2,428)                | 25,875 (2,477)                |
| R <sub>work</sub> /R <sub>free</sub>           | 0.2110/0.2412                 | 0.2031/0.2350                 | 0.2115/0.2457                 | 0.2160/0.2369                 |
| Atoms                                          | 2,161                         | 2,169                         | 2,188                         | 2,133                         |
| Protein/ligand/water                           | 1,927/208/26                  | 1,917/224/28                  | 1,925/239/24                  | 1,898/210/25                  |
| B-factor                                       | 79.92                         | 83.08                         | 91.15                         | 81.30                         |
| Protein/ligand/water                           | 79.4/86.4/67.2                | 82.0/93.2/76.5                | 89.45/105.9/80.5              | 80.48/89.34/76.49             |
| RMSD deviations                                |                               |                               |                               |                               |
| RMSD bonds (Å)                                 | 0.007                         | 0.008                         | 0.008                         | 0.008                         |
| RMSD angles (degrees)                          | 0.98                          | 1.08                          | 0.84                          | 1.06                          |
| MolProbity analysis                            |                               |                               |                               |                               |
| Ramachandran outliers (%)                      | 0.00                          | 0.00                          | 0.00                          | 0.00                          |
| Ramachandran favored (%)                       | 98.30                         | 97.86                         | 98.29                         | 97.41                         |
| Clash score                                    | 8.00                          | 9.33                          | 8.99                          | 10.8                          |
| Overall score                                  | 2.25                          | 2.24                          | 2.11                          | 2.27                          |

<sup>a</sup>R<sub>meas</sub> =  $\Sigma(N/(N-1))^{1/2} \cdot |I - \langle I \rangle| / \Sigma I$ , where N = the number of symmetry related reflections, I = the observed intensity for a reflection, and  $\langle I \rangle$  = the average intensity obtained from multiple observations of symmetry-related reflections.

<sup>b</sup>R<sub>pim</sub> =  $\Sigma(1/(N-1))^{1/2} \cdot |I - \langle I \rangle| / \Sigma I$ .

<sup>c</sup>CC<sub>1/2</sub> = The Pearson Correlation Coefficient between intensities calculated from random half datasets.

## References

- Balsler, J.R., H.B. Nuss, N. Chiamvimonvat, M.T. Pérez-García, E. Marban, and G.F. Tomaselli. 1996. External pore residue mediates slow inactivation in mu 1 rat skeletal muscle sodium channels. *J. Physiol.* 494:431–442. <https://doi.org/10.1113/jphysiol.1996.sp021503>
- Chancey, J.H., P.E. Shockett, and J.P. O'Reilly. 2007. Relative resistance to slow inactivation of human cardiac Na<sup>+</sup> channel hNav1.5 is reversed by lysine or glutamine substitution at V930 in D2-S6. *Am. J. Physiol. Cell Physiol.* 293:C1895–C1905. <https://doi.org/10.1152/ajpcell.00377.2007>
- Chen, Y., F.H. Yu, D.J. Surmeier, T. Scheuer, and W.A. Catterall. 2006. Neuromodulation of Na<sup>+</sup> channel slow inactivation via cAMP-dependent protein kinase and protein kinase C. *Neuron*. 49:409–420. <https://doi.org/10.1016/j.neuron.2006.01.009>
- Hilber, K., W. Sandtner, T. Zarrabi, E. Zebedin, O. Kudlacek, H.A. Fozzard, and H. Todt. 2005. Selectivity filter residues contribute unequally to pore stabilization in voltage-gated sodium channels. *Biochemistry*. 44:13874–13882. <https://doi.org/10.1021/bi0511944>
- O'Reilly, J.P., S.Y. Wang, and G.K. Wang. 2000. A point mutation in domain 4-segment 6 of the skeletal muscle sodium channel produces an atypical inactivation state. *Biophys. J.* 78:773–784. [https://doi.org/10.1016/S0006-3495\(00\)76635-5](https://doi.org/10.1016/S0006-3495(00)76635-5)
- O'Reilly, J.P., S.Y. Wang, and G.K. Wang. 2001. Residue-specific effects on slow inactivation at V787 in D2-S6 of Na(v)1.4 sodium channels. *Biophys. J.* 81:2100–2111. [https://doi.org/10.1016/S0006-3495\(01\)75858-4](https://doi.org/10.1016/S0006-3495(01)75858-4)
- Ong, B.H., G.F. Tomaselli, and J.R. Balsler. 2000. A structural rearrangement in the sodium channel pore linked to slow inactivation and use dependence. *J. Gen. Physiol.* 116:653–662. <https://doi.org/10.1085/jgp.116.5.653>
- Takahashi, M.P., and S.C. Cannon. 1999. Enhanced slow inactivation by V445M: a sodium channel mutation associated with myotonia. *Biophys. J.* 76:861–868. [https://doi.org/10.1016/S0006-3495\(99\)77249-8](https://doi.org/10.1016/S0006-3495(99)77249-8)

- Todt, H., S.C. Dudley Jr., J.W. Kyle, R.J. French, and H.A. Fozzard. 1999. Ultra-slow inactivation in  $\mu$ l Na<sup>+</sup> channels is produced by a structural rearrangement of the outer vestibule. *Biophys. J.* 76:1335–1345. [https://doi.org/10.1016/S0006-3495\(99\)77296-6](https://doi.org/10.1016/S0006-3495(99)77296-6)
- Vedantham, V., and S.C. Cannon. 2000. Rapid and slow voltage-dependent conformational changes in segment IVS6 of voltage-gated Na<sup>(+)</sup> channels. *Biophys. J.* 78:2943–2958. [https://doi.org/10.1016/S0006-3495\(00\)76834-2](https://doi.org/10.1016/S0006-3495(00)76834-2)
- Wang, S.Y., and G.K. Wang. 1997. A mutation in segment I-S6 alters slow inactivation of sodium channels. *Biophys. J.* 72:1633–1640. [https://doi.org/10.1016/S0006-3495\(97\)78809-X](https://doi.org/10.1016/S0006-3495(97)78809-X)
- Wang, S.Y., C. Russell, and G.K. Wang. 2005. Tryptophan substitution of a putative D4S6 gating hinge alters slow inactivation in cardiac sodium channels. *Biophys. J.* 88:3991–3999. <https://doi.org/10.1529/biophysj.105.059352>
- Xiong, W., Y.Z. Farukhi, Y. Tian, D. Disilvestre, R.A. Li, and G.F. Tomaselli. 2006. A conserved ring of charge in mammalian Na<sup>+</sup> channels: a molecular regulator of the outer pore conformation during slow inactivation. *J. Physiol.* 576:739–754. <https://doi.org/10.1113/jphysiol.2006.115105>
